# Supplementary material for: A lead-free zero-dimensional hybrid antimony halide perovskite X-ray scintillator with exceptional emission efficiency and excellent stability as a highly sensitive fluorescent probe
Source: Royal Society of Chemistry journal article supplement (doi:10.1039/d4qi01114g), 2024-01-01
Supplement: d4qi01114g1.pdf [file d4qi01114g1.pdf]

## Supporting Information

# Lead-Free Zero-Dimensional Hybrid Antimony Halide Perovskite X-ray Scintillator with Exceptional Emission Efficiency and Excellent Stability as a Highly Sensitive Fluorescent Probe

Yu-Yin Wang,<sup>a</sup> Guo-Hao Jia,<sup>a</sup> Meng-Rui Huo,<sup>a</sup> Ming-Tao Cheng,<sup>a</sup> Xiang-Yu Chen,<sup>a</sup> Ai-Rui Chang,<sup>a</sup> Jie Zhang,<sup>a</sup> Yun-Yun Li,<sup>b</sup> and Guo-Ming Lin<sup>\*cd</sup>

<sup>a</sup> School of Chemistry, Chemical Engineering and Materials, Jining University, Qufu, Shandong, 273155, P. R. China.

<sup>b</sup> Department of chemical Engineering, College of Environmental and Biological Engineering, Putian University, Putian 351100, China.

<sup>c</sup> Fujian Institute of Research on the Structure of Matter, Chinese Academy of Sciences, Fuzhou, Fujian 350002, China.

<sup>d</sup> Department of Physics, National University of Singapore, Singapore 117551, Singapore. E-mail: [lingmdbs@nus.edu.sg](mailto:lingmdbs@nus.edu.sg)

## Experimental section

### 1. Materials

Antimony trichloride ( $\text{SbCl}_3$ , 99%, Aladdin), 1-(2-fluorophenyl)piperazine (FPPP, 98%, Aladdin), hydrochloric acid ( $\text{HCl}$ , 38%, Aladdin), hypophosphorous acid ( $\text{H}_3\text{PO}_2$ , AR, 50 wt. % in  $\text{H}_2\text{O}$ , Aladdin), and butyl alcohol ( $\text{CH}_3(\text{CH}_2)_3\text{OH}$ , , Aladdin). All chemicals were purchased and used without any further purification.

### 2. Synthesis of $[\text{FPPP}]_2\text{SbCl}_7$

Single crystal of  $[\text{FPPP}]_2\text{SbCl}_7$  was facilely prepared through solution evaporation method. In the synthesis of  $[\text{FPPP}]_2\text{SbCl}_7$  single crystals, powder antimony trichloride (6.757mmol, 1.54 g) was first dissolved in a concentrated mixture of hydrochloric acid (15 ml) and hypophosphorous acid (15 ml). Next, 45 ml organic solvent butyl alcohol and add 1-(2-fluorophenyl)piperazine (13.52 mmol, 2.435 g) were added to the solution. The solution rapidly produces a large amount of precipitation due to the formation of a large number of halides. The solution and halide precipitation were ultrasound until no precipitation, then placed on a hot plate and heated at 100 °C for 5 minutes. After cooling down to room temperature, the precipitated crystals were taken out, washed by butyl alcohol and dried with a vacuum oven at 60 °C.

### 3. Characterization methods

Single-crystal X-ray diffraction data of  $[\text{FPPP}]_2\text{SbCl}_7$  was collected using a Bruker D8 Quest diffractometer with Mo  $K\alpha$  radiation ( $\lambda = 0.71073 \text{ \AA}$ ). The structures were solved and refined by the SHELXL-2018/3 program within OLEX2, with all atoms being refined with anisotropic atomic displacement parameters. The powder X-ray diffraction (PXRD) pattern was collected using a Rigaku MiniFlex II diffractometer, operating at 40 kV and 40 mA with Cu  $K\alpha$  radiation ( $\lambda = 1.5406 \text{ \AA}$ ). The diffraction pattern was scanned over the angular range of 10–50° (2 $\theta$ ) with a step size of 1° min<sup>-1</sup> at room temperature. Thermogravimetric analysis (TGA) was carried out using a Netzsch STA 449C thermal system, with samples heated from room temperature to 800 °C at a rate of 10 °C min<sup>-1</sup> under an  $\text{N}_2$  atmosphere. Solid-state UV-vis optical absorption spectra were performed on a PE Lambda 900 UV-vis spectrophotometer. X-ray photoelectron

spectroscopy (XPS) spectra were tested using the Escalab XI+ instrument, USA. SEM and EDS images were obtained using the Hitachi SU-8010 field emission scanning electron microscopy. The PL spectrum was measured using an Edinburgh FLS1000 fluorescence spectrometer. The PLQY was acquired using an Edinburgh FLS980 fluorescence spectrometer equipped with a xenon lamp and a calibrated integrating sphere. Time-resolved attenuation data were collected using the Edinburgh FLS980 fluorescence spectrometer and a picosecond pulsed diode laser.

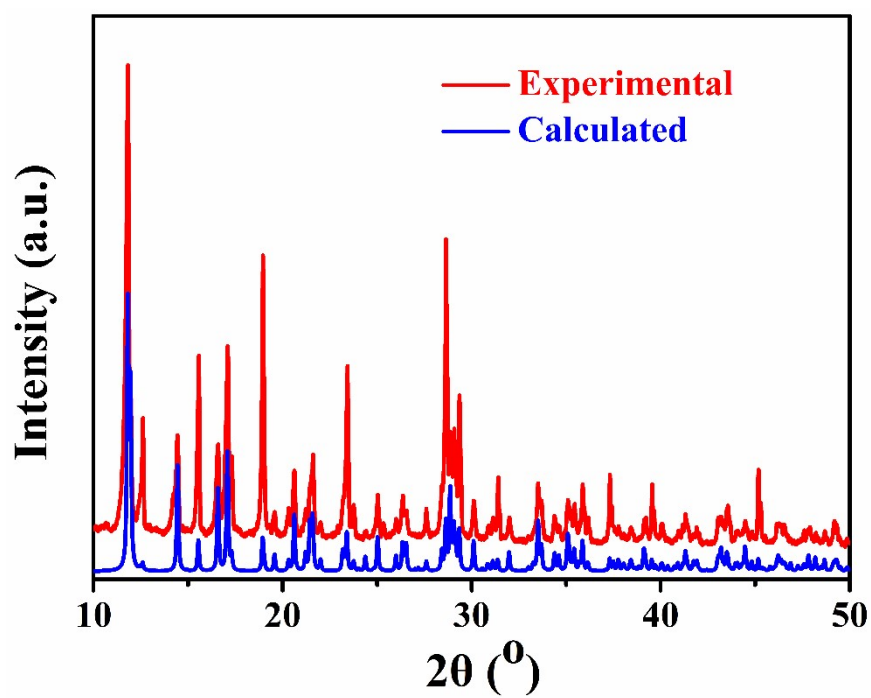

**Figure S1.** Experimental and simulated PXRD patterns of [FPPP]<sub>2</sub>SbCl<sub>7</sub> powder at room temperature.

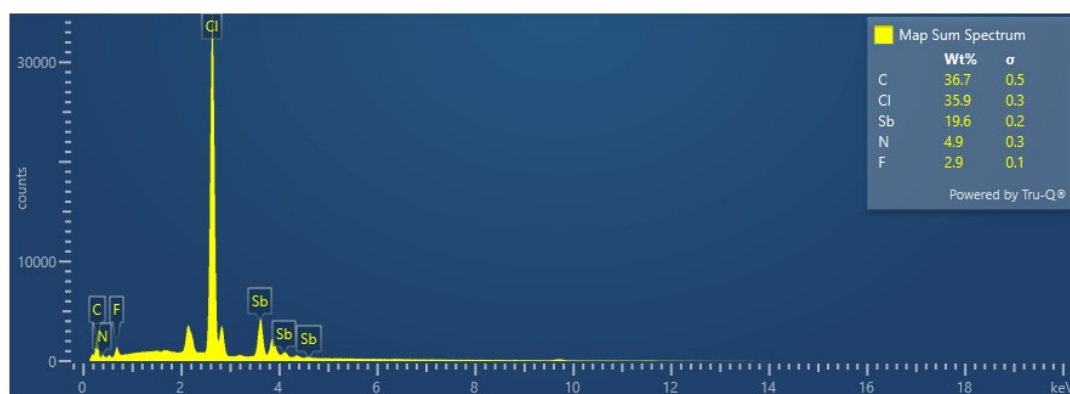

**Figure S2.** EDS result of [FPPP]<sub>2</sub>SbCl<sub>7</sub> bulk crystal.

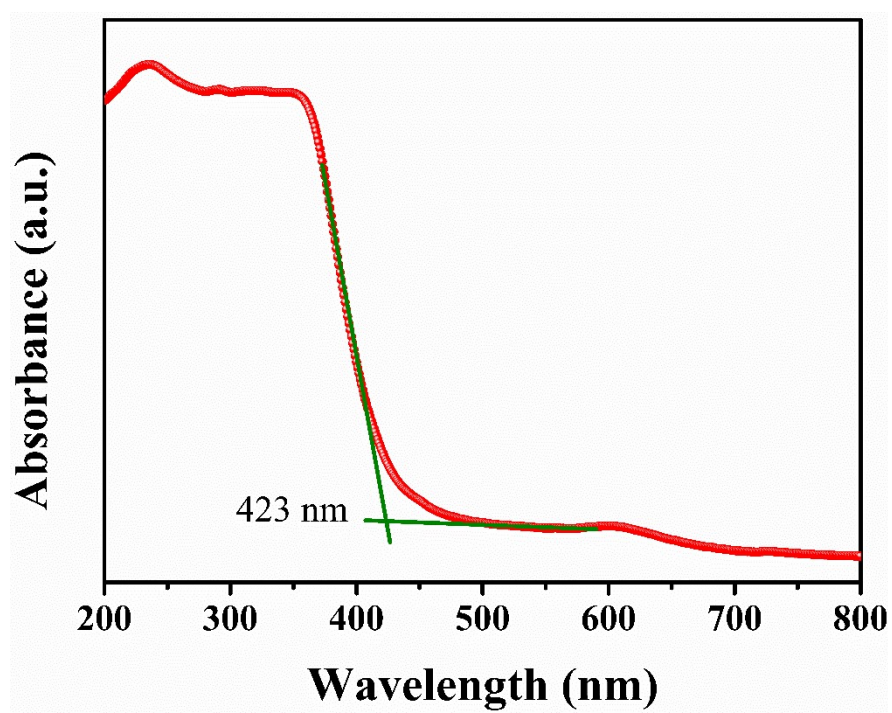

**Figure S3.** UV/Vis absorption spectra of  $[\text{FPPP}]_2\text{SbCl}_7$ .

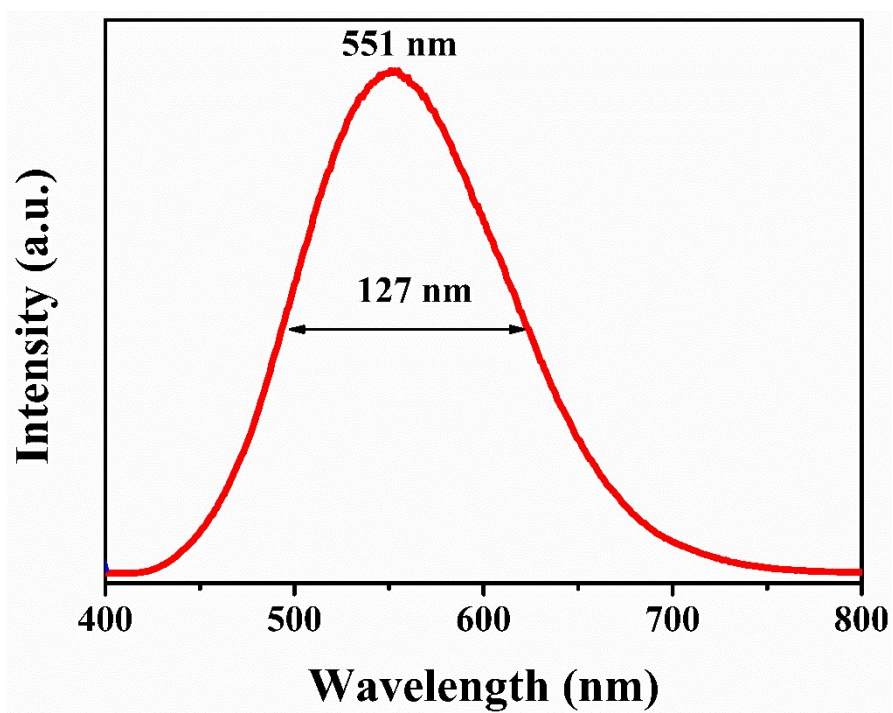

**Figure S4.** Full-width at half-maximum (FWHM) of the PL intensity of [FPPP]<sub>2</sub>SbCl<sub>7</sub> crystals.

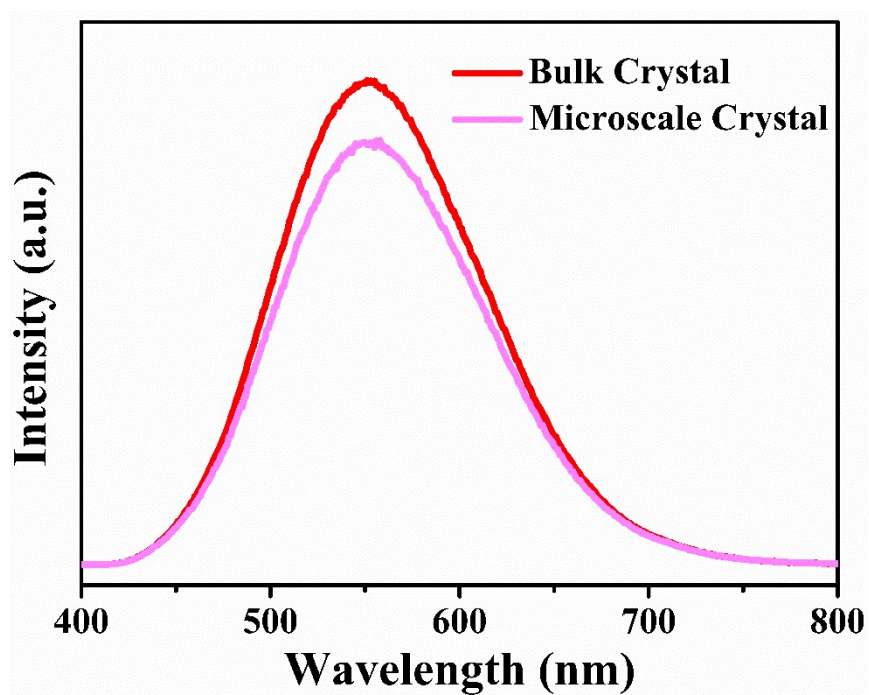

**Figure S5.** Comparison of PL emission spectra of bulk and microscale crystals for  $[FPPP]_2SbCl_7$ .

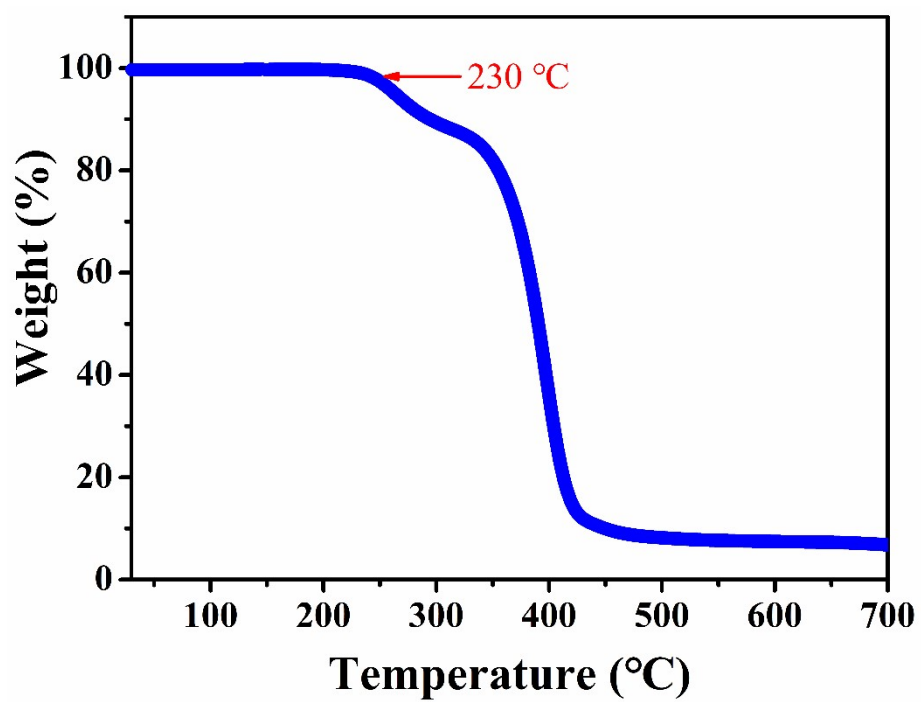

**Figure S6.** TG spectrum of  $[\text{FPPP}]_2\text{SbCl}_7$ .

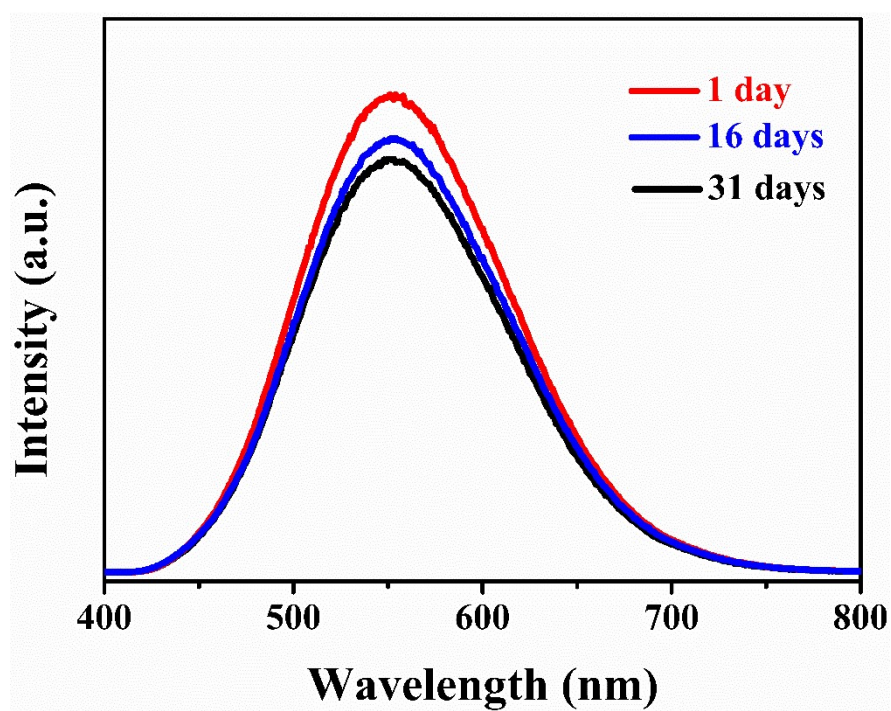

**Figure S7.** PL emission spectra of [FPPP]<sub>2</sub>SbCl<sub>7</sub> after storage in humid air for various days.

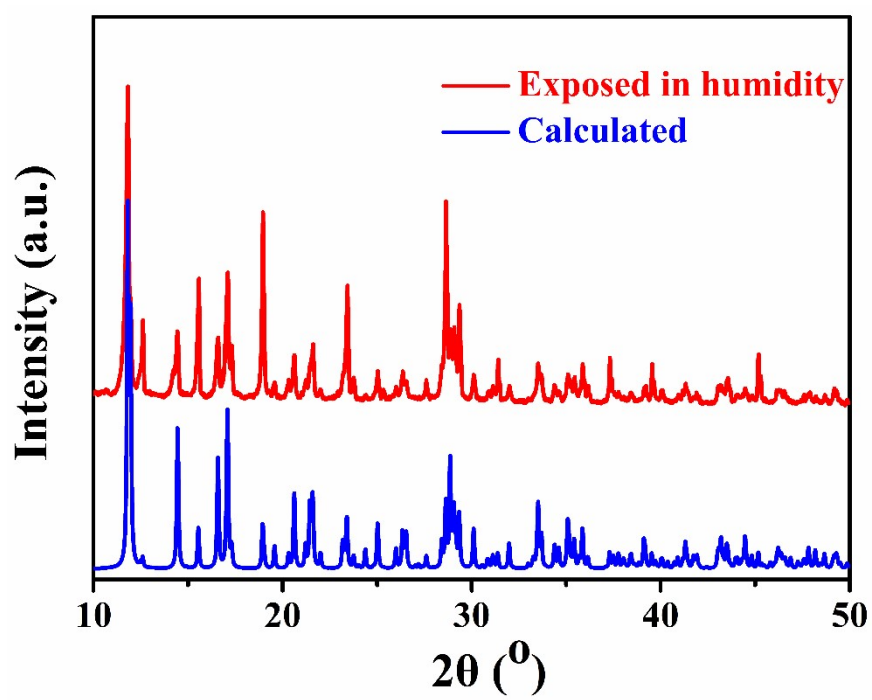

**Figure S8.** PXRD pattern of  $[\text{FPPP}]_2\text{SbCl}_7$  after storing in humid air.

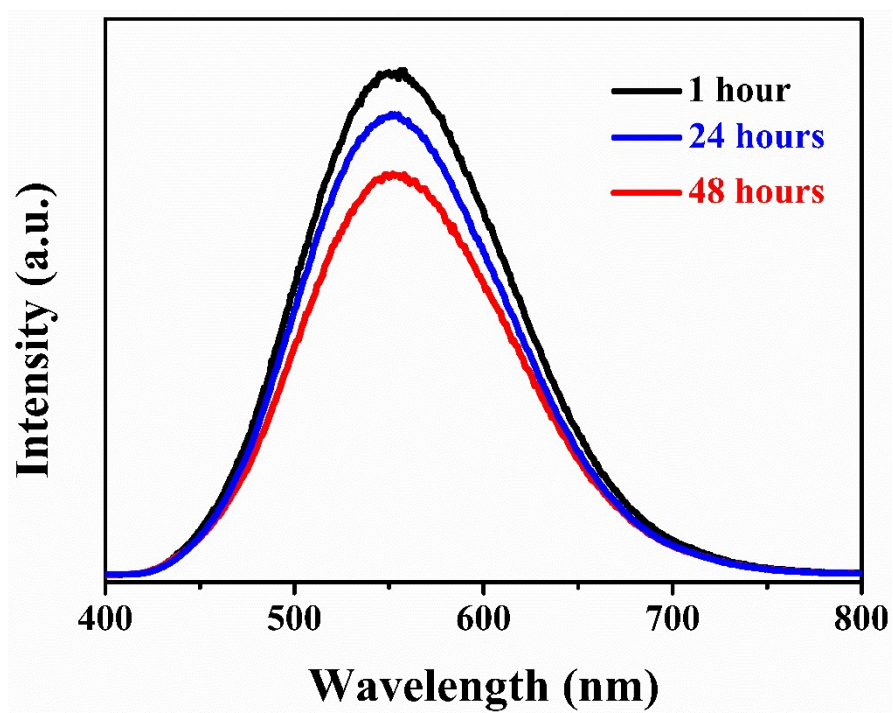

**Figure S9.** PL emission spectra of [FPPP]<sub>2</sub>SbCl<sub>7</sub> after exposing in the light condition.

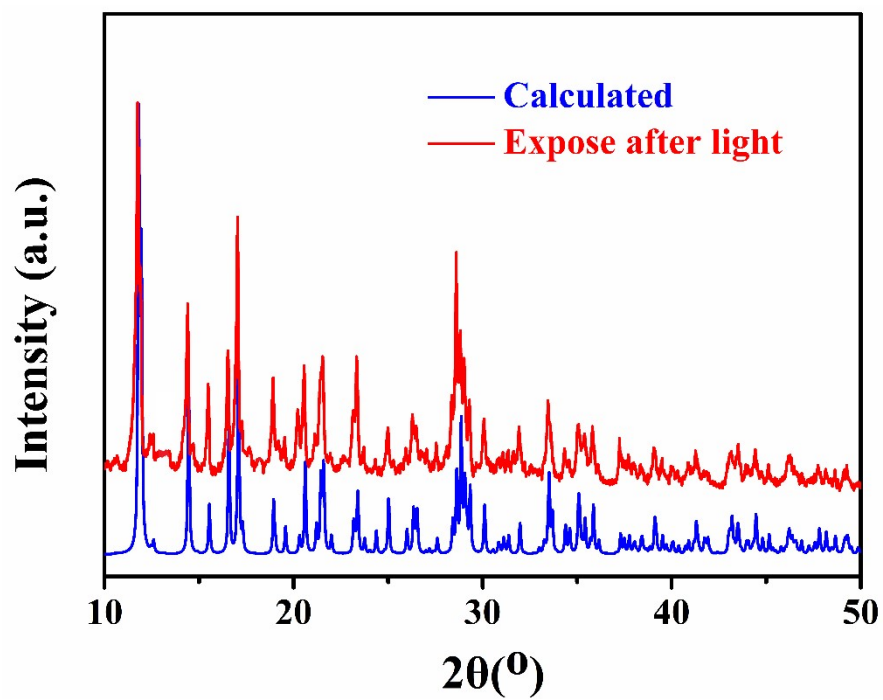

**Figure S10.** PXRD of  $[FPPP]_2SbCl_7$  after exposing in the light condition for 48 hours.

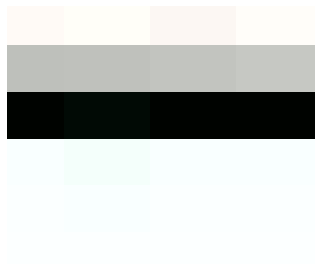

**Figure S11.** The photo image of crystals under X-ray light for  $[\text{FPPP}]_2\text{SbCl}_7$ .

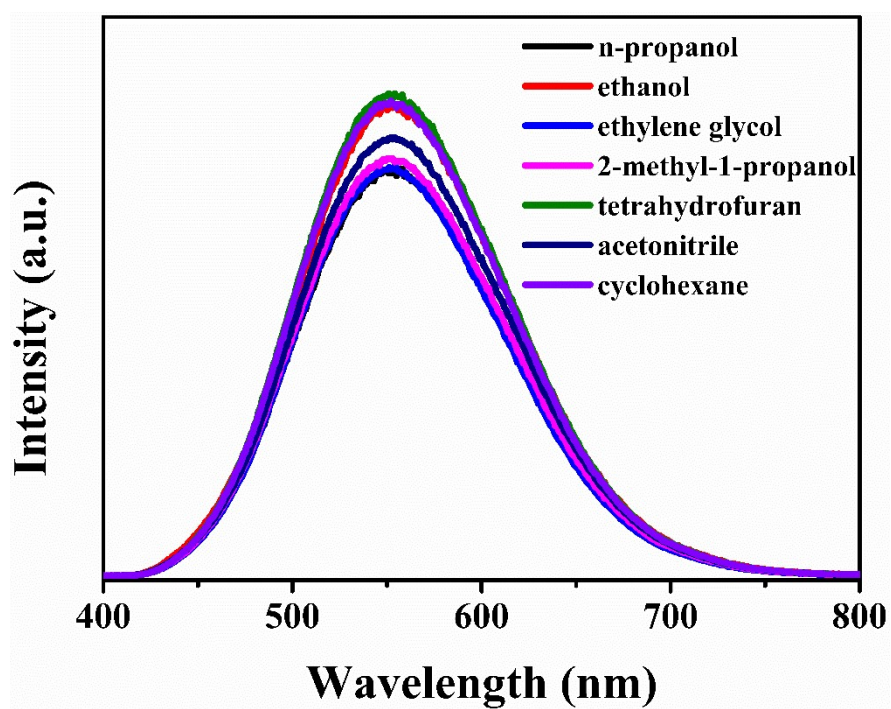

**Figure S12.** PL emission spectra of [FPPP]<sub>2</sub>SbCl<sub>7</sub> after soaking in various organic solvents for one day.

**Table S1.** Crystal Data and Structural Refinements for [FPPP]<sub>2</sub>SbCl<sub>7</sub> single crystal.

|                                                                  |                                                                                   |
|------------------------------------------------------------------|-----------------------------------------------------------------------------------|
| Compound                                                         | [FPPP] <sub>2</sub> SbCl <sub>7</sub>                                             |
| Empirical formula                                                | (C <sub>10</sub> H <sub>16</sub> N <sub>2</sub> F) <sub>2</sub> SbCl <sub>7</sub> |
| CCDC number                                                      | 2328997                                                                           |
| Formula weight                                                   | 736.39                                                                            |
| Crystal system                                                   | monoclinic                                                                        |
| Space group                                                      | <i>C2/c</i>                                                                       |
| <i>a</i> (Å)                                                     | 12.7608(12)                                                                       |
| <i>b</i> (Å)                                                     | 28.083(3)                                                                         |
| <i>c</i> (Å)                                                     | 8.4298(7)                                                                         |
| $\alpha$ (°)                                                     | 90                                                                                |
| $\beta$ (°)                                                      | 102.424(3)                                                                        |
| $\gamma$ (°)                                                     | 90                                                                                |
| <i>V</i> (Å <sup>3</sup> )                                       | 2950.2(5)                                                                         |
| <i>Z</i>                                                         | 4                                                                                 |
| $\rho_{\text{caled}}$ (g·cm <sup>-3</sup> )                      | 1.658                                                                             |
| Temperature (K)                                                  | 273.15                                                                            |
| $\mu$ (mm <sup>-1</sup> )                                        | 1.600                                                                             |
| <i>F</i> (000)                                                   | 1472.0                                                                            |
| Reflections collected                                            | 23164                                                                             |
| Theta range for data collection (°)                              | 5.442 to 56.748                                                                   |
| Index ranges                                                     | -16 ≤ <i>h</i> ≤ 16, -37 ≤ <i>k</i> ≤ 37, -11 ≤ <i>l</i> ≤ 11                     |
| Independent reflections                                          | 3690 [ <i>R</i> <sub>int</sub> = 0.0443, <i>R</i> <sub>sigma</sub> = 0.0328]      |
| Data/restraints/parameters                                       | 3690/171/147                                                                      |
| Goodness-of-fit on <i>F</i> <sup>2</sup>                         | 1.036                                                                             |
| Final <i>R</i> indexes ( <i>I</i> > 2σ( <i>I</i> )) <sup>a</sup> | <i>R</i> <sub>1</sub> = 0.0930, <i>wR</i> <sub>2</sub> = 0.2705                   |
| Final <i>R</i> indexes [all data]                                | <i>R</i> <sub>1</sub> = 0.1079, <i>wR</i> <sub>2</sub> = 0.2860                   |

<sup>a</sup>  $R_1 = \Sigma ||F_o| - |F_c|| / \Sigma |F_o|$ ,  $wR_2 = [\Sigma (F_o^2 - F_c^2) / \Sigma w(F_o)^2]^{1/2}$
